# Supplementary material for: Control of stoichiometry, size and morphology of inorganic polymers by template assisted coordination chemistry
Source: Royal Society of Chemistry journal article supplement (doi:10.1039/c0jm01552k), 2010-01-01
Supplement: c0jm01552k.pdf [file c0jm01552k.pdf]

## Supporting Information

# Control of stoichiometry, size and morphology of inorganic polymers by template assisted coordination chemistry

*Pierrick Durand<sup>1</sup>, Giulia Fornasieri<sup>1</sup>, Cédric Baumier<sup>1</sup>, Patricia Beaunier<sup>2</sup>, Dominique Durand<sup>3</sup>, Eric  
Rivière<sup>1</sup> and Anne Bleuzen<sup>1\*</sup>*

<sup>1</sup> Université Paris-Sud 11, UMR 8182 ICMMO - Equipe de Chimie Inorganique, 91405 Orsay (France)

<sup>2</sup> UPMC – Université Paris 6 and CNRS, UMR 7197 Laboratoire de Réactivité de Surface, 75252 Paris  
(France)

<sup>3</sup> Université Paris-Sud 11, UMR 8619 Institut Biochimie et Biophysique Moléculaire et Cellulaire,  
91405 Orsay (France)

\* e-mail : [anne.bleuzen@u-psud.fr](mailto:anne.bleuzen@u-psud.fr)

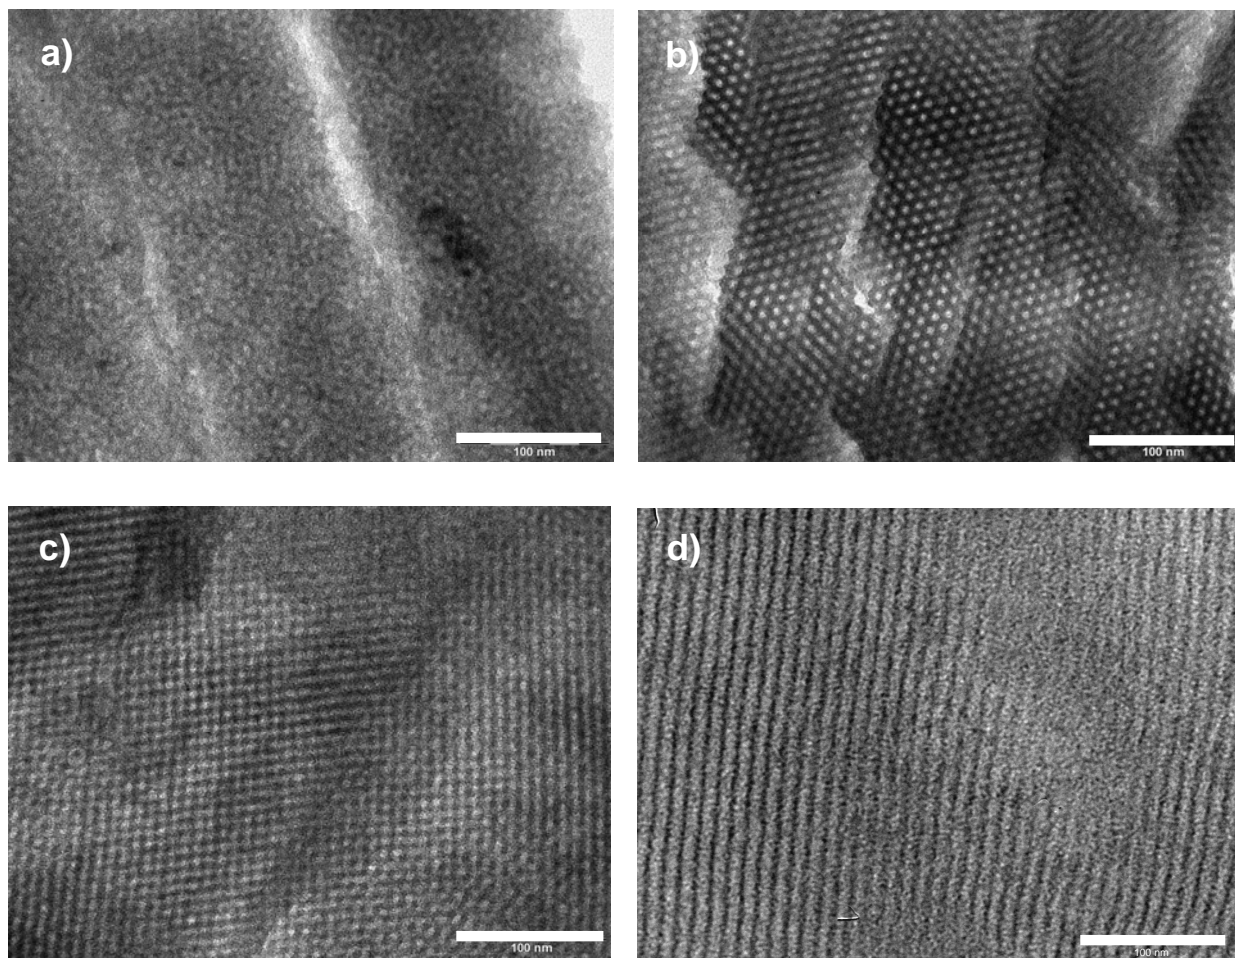

Figure S1. TEM micrographs of 2% wt Co<sup>2+</sup>-containing silica-copolymer monoliths (microtomed samples) with various dimensional structures; a) wormlike, b) 2D-hexagonal, c) 3D-cubic, and d) lamellar. Scale bar is 100 nm.

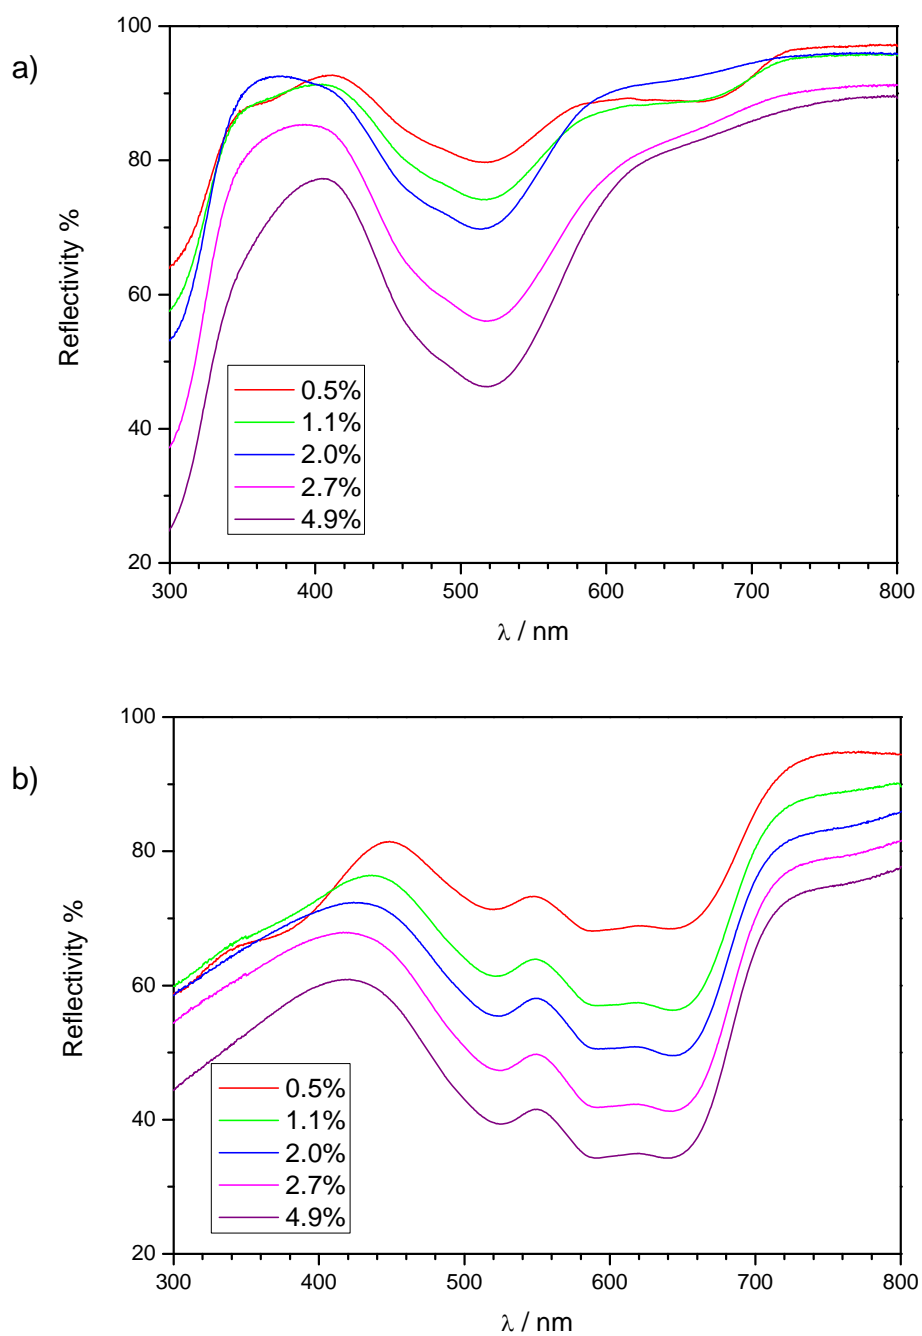

Figure S2. UV-visible spectra of the Co<sup>2+</sup>-containing (0.5-4.9% wt) silica monoliths a) as-synthesized, b) after thermal treatment at 500°C.

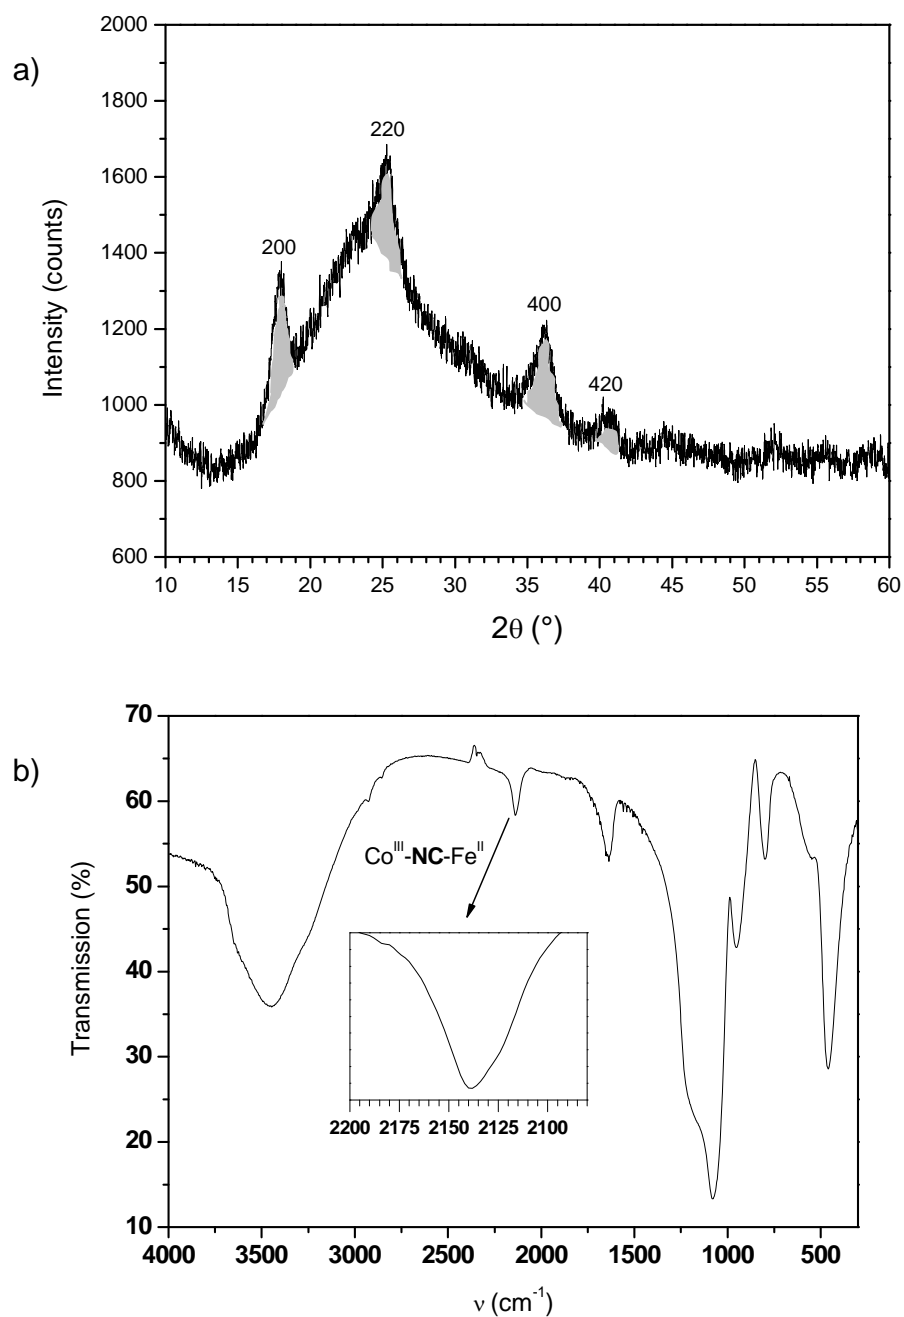

Figure S3. a) X-ray diffraction pattern ( $\text{Cu K}\alpha$ ) of CoFe PBA – silica nanocomposite.

CoFe PBA reflections: (200)= $17.9^\circ$ , (220)= $25.2^\circ$ , (400)= $36.3^\circ$ , (420)= $40.7^\circ$ .

b) FTIR spectrum of CoFe PBA – silica nanocomposite.

Table S1.

Elemental analysis and proposed composition for CoFe PBA – silica nanocomposite.

|                                                                                                                               | Si   | Co   | Fe   | K    | C    | N    | H    | O     |
|-------------------------------------------------------------------------------------------------------------------------------|------|------|------|------|------|------|------|-------|
| % exptl                                                                                                                       | 36.5 | 0.75 | 0.55 | 0.11 | 0.90 | 0.70 | 1.66 | 58.83 |
| (calcd)                                                                                                                       | 36.3 | 0.74 | 0.54 | 0.11 | 0.70 | 0.80 | 2.17 | 58.61 |
| proposed composition $\text{K}_{0.9}\text{Co}_4[\text{Fe}(\text{CN})_6]_{3.1}(\text{SiO}_2)_{412}(\text{H}_2\text{O})_{1156}$ |      |      |      |      |      |      |      |       |
